# Supplementary material
Source: PubMed Central journal article supplement (PMC3674387)
Supplement: cr201348x1.pdf [file cr201348x1.pdf]

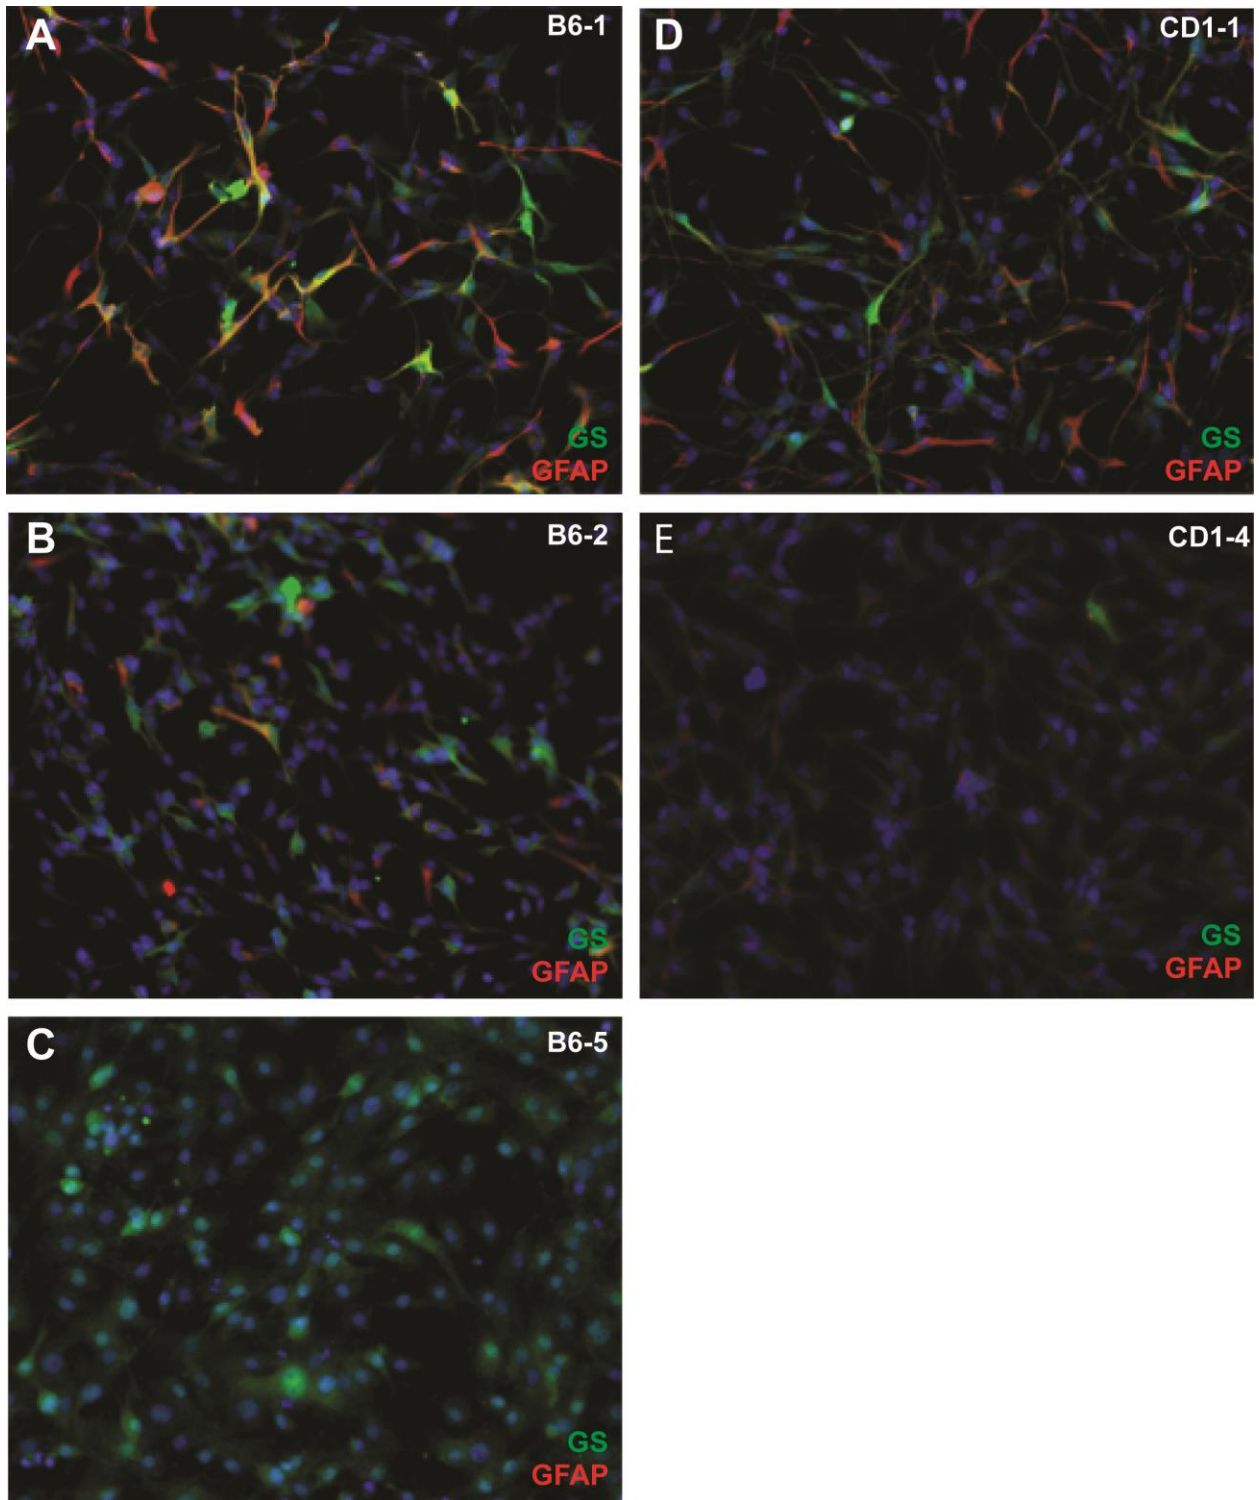

**Supplementary information, Figure S1** Retinal stem cell lines express different levels of Müller cell markers.

3 B6 (A-C) and 2 CD1 (D and E) cell lines are analyzed for GS (green) and GFAP (red) expression. The CD1-4 cell line has very low GS and GFAP expression. B6-5 cell line only expresses GS and no GFAP. The other three cell lines express different levels of GFAP and GS. For the B6-5 cell line, GS is mainly located in the nuclei, different from the other 4 cell lines with equal distribution in the cytoplasm and nuclei.
