# Supplementary material
Source: PubMed Central journal article supplement (PMC3674387)
Supplement: cr201348x2.pdf [file cr201348x2.pdf]

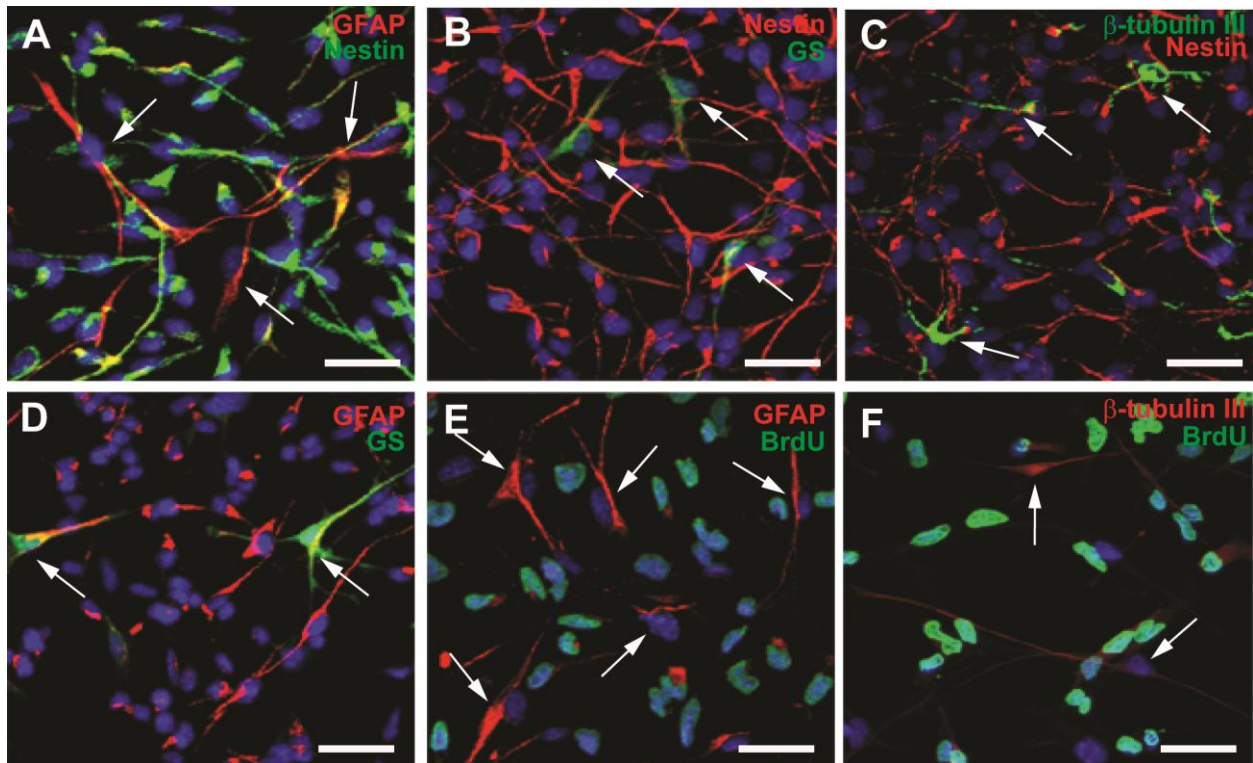

**Supplementary information, Figure S2** Retinal stem cells over long-term culture express different levels of Müller cell markers.

(A-C) Little to no colocalization of Nestin and GS, GFAP, or  $\beta$ -tubulinIII is observed. The cells with the higher level of expression of GFAP (A), GS (B) and  $\beta$ -tubulinIII (C) with long process have lower level of Nestin (arrows). (D) GFAP<sup>high</sup> cells also express high level of GS (arrows), indicating these cells with long processes are differentiated Müller cells. (E) GFAP<sup>high</sup> cells have no BrdU incorporation within 48h (arrows). (F) Most of  $\beta$ -tubulinIII<sup>high</sup> cells lose proliferation status (arrows). Scale bar: 25 $\mu$ m.
