# Supplementary material
Source: PubMed Central journal article supplement (PMC3674387)
Supplement: cr201348x3.pdf [file cr201348x3.pdf]

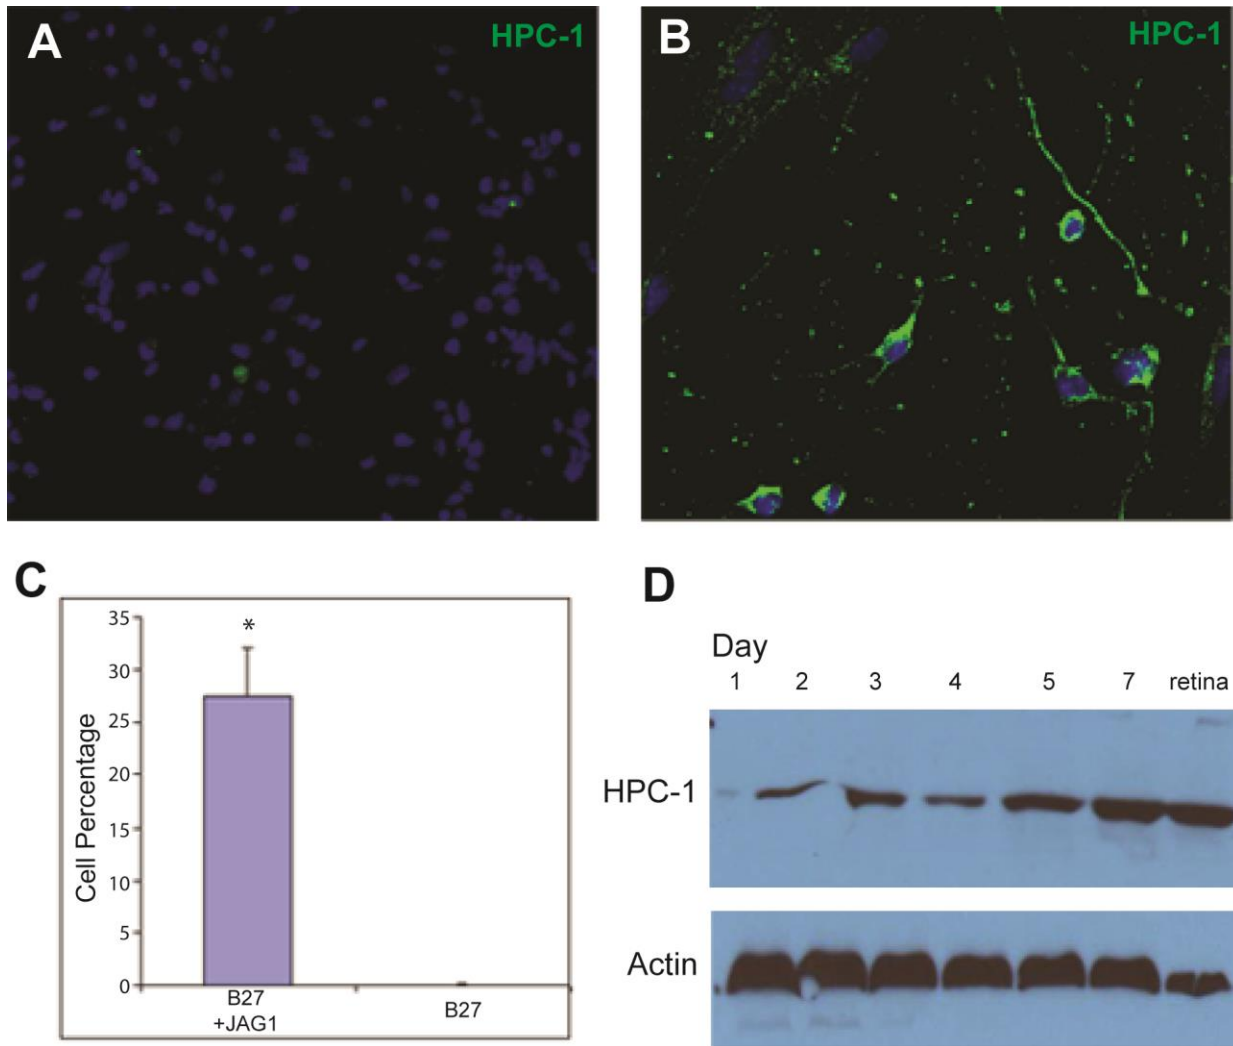

**Supplementary information, Figure S3** Retinal stem cells can differentiate into highly enriched amacrine cells after the activation of Notch signaling.

(A) A representative image of retinal stem cells in B27-containing medium for 6 days. Almost no cells expressed HPC-1. (B) A representative image of differentiated amacrine cells from retinal stem cells in the B27- and JAG1-containing medium for 6 days. (C) Quantification of number of HPC-1-positive using two different medium formulations. (D) Western blotting showing the expression of HPC-1 over the course of differentiation in the JAG1-containing medium. Data is shown as mean  $\pm$  standard error of the mean (\*,  $p < 0.05$ ).
