# Supplementary material
Source: PubMed Central journal article supplement (PMC3674387)
Supplement: cr201348x4.pdf [file cr201348x4.pdf]

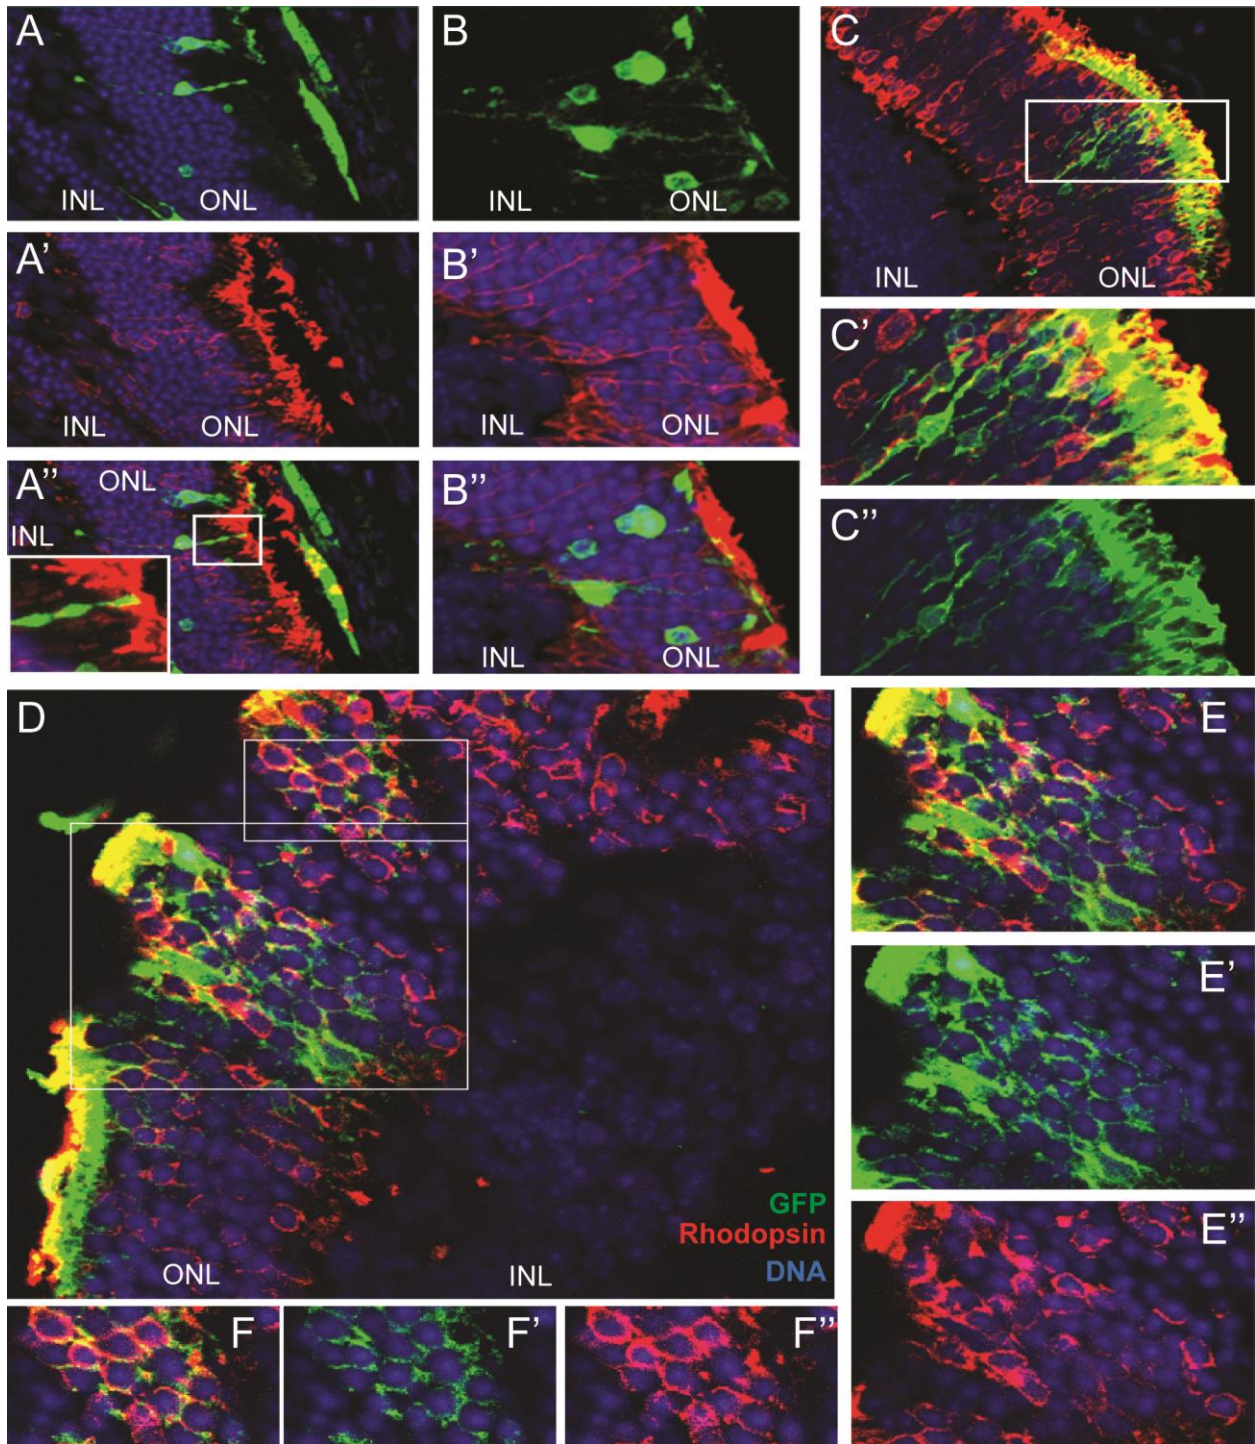

**Supplementary information, Figure S4** Differentiated photoreceptor cells can integrate into ONL of *rd7* mouse retina and express a functional marker of rod photoreceptors.

(A-D) In different regions containing transplanted cells from different animals, coexpression of GFP (green) and Rhodopsin (red) can be observed in many cells. (C''-C'') are higher-power images of boxed regions in (C). (E-E'') and (F-F'') are higher-power images of the boxed region in (D). Blue: DAPI.
