# Supplementary material
Source: PubMed Central journal article supplement (PMC3674387)
Supplement: cr201348x5.pdf [file cr201348x5.pdf]

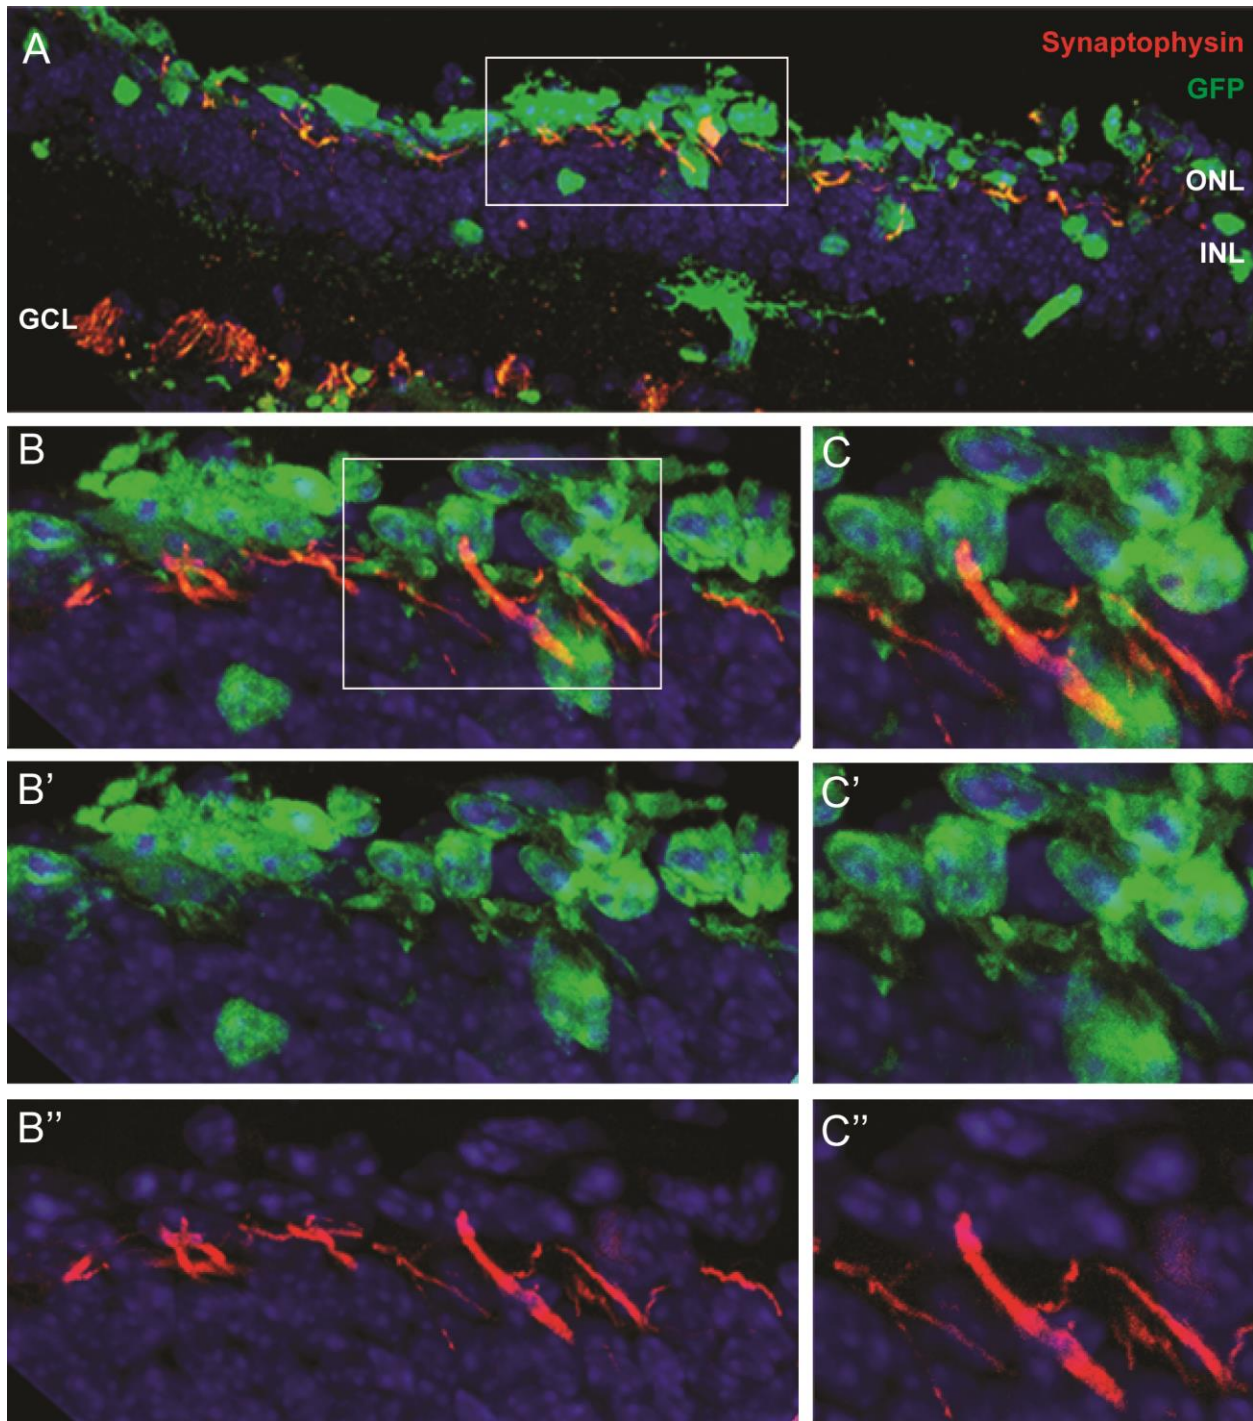

**Supplementary information, Figure S5** Transplanted photoreceptors form functional synapses 4-5 weeks after transplantation into FVB/NJ pups. (A) Transplanted GFP-positive cells leave the subretinal space and integrate into OPL and INL and express axon marker Synaptophysin (red). (B-B') High-power view of the boxed region in (A). (C-C'') High-power view of the boxed region in (B). Blue: DAPI.
