# Supplementary material
Source: PubMed Central journal article supplement (PMC3674387)
Supplement: cr201348x6.pdf [file cr201348x6.pdf]

A

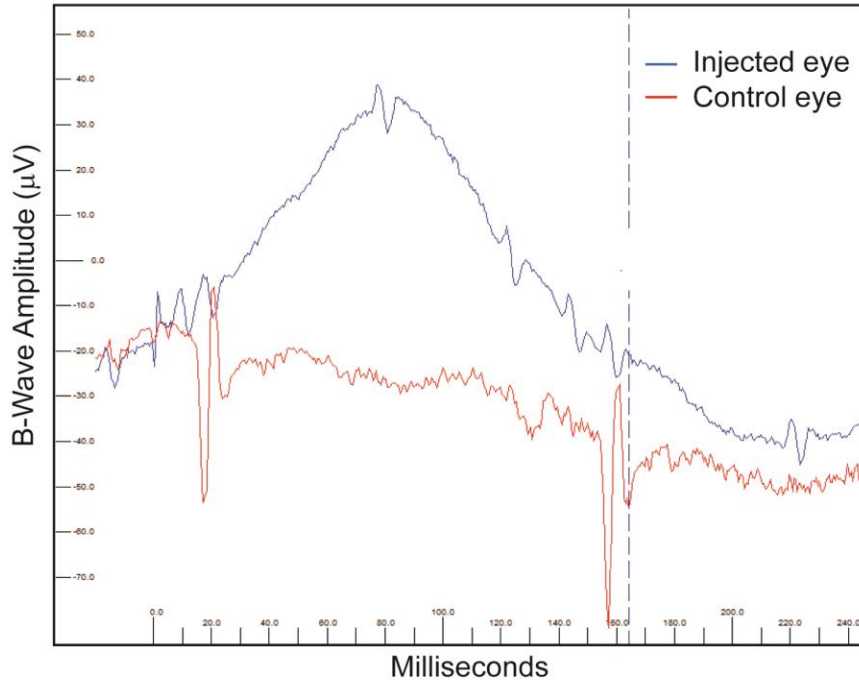

B

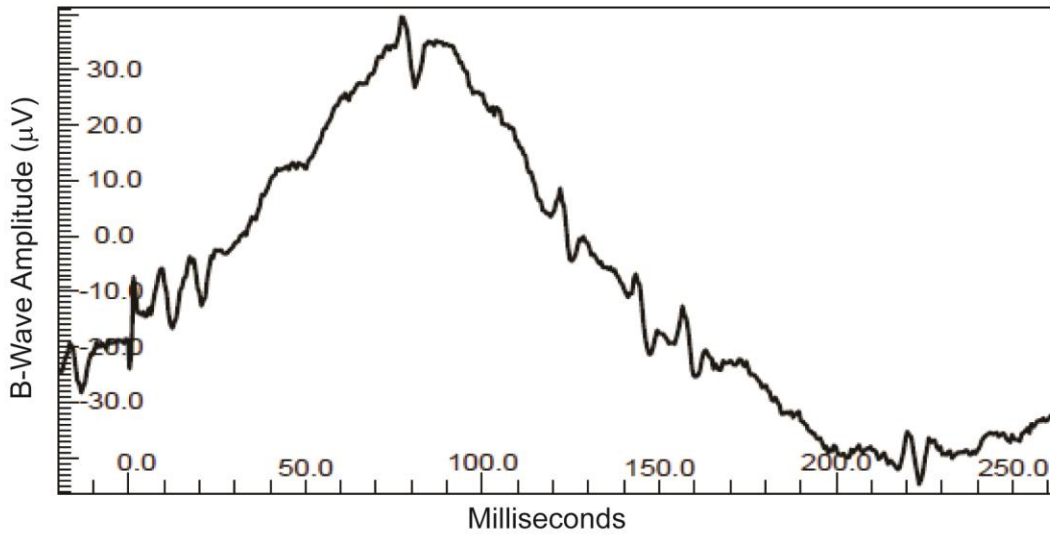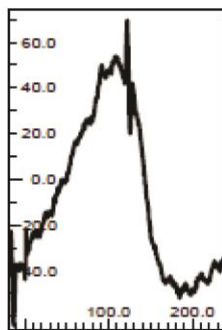

Sample 1

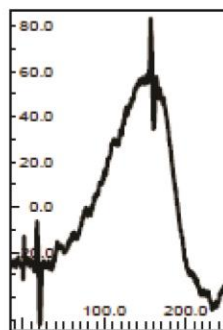

Sample 2

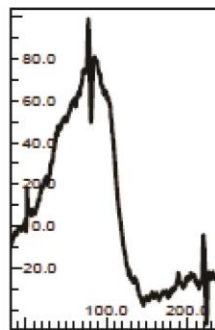

Sample 3

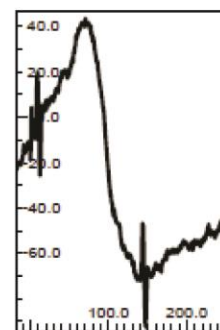

Sample 4

**Supplementary information, Figure S6** Transplanted retinal stem cell-derived photoreceptors restore visual function in *rd1* mouse eye.

(A) A representative waveform from injected eye (blue) and control eye (red) presented with light flashes of 3000 mcd.s/m<sup>2</sup> 4 weeks after transplantation. (B) The waveform represents the average signal recorded after four independent flashes of light, separated by one minute (Samples 1-4).
