# Supplementary material
Source: PubMed Central journal article supplement (PMC3674387)
Supplement: cr201348x7.pdf [file cr201348x7.pdf]

A

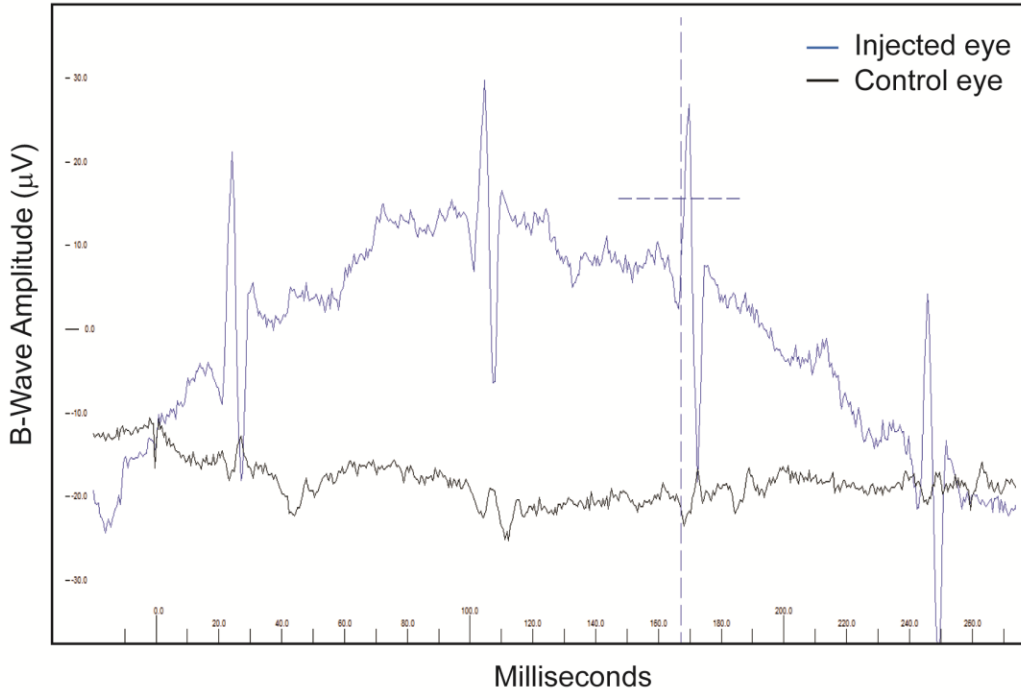

B

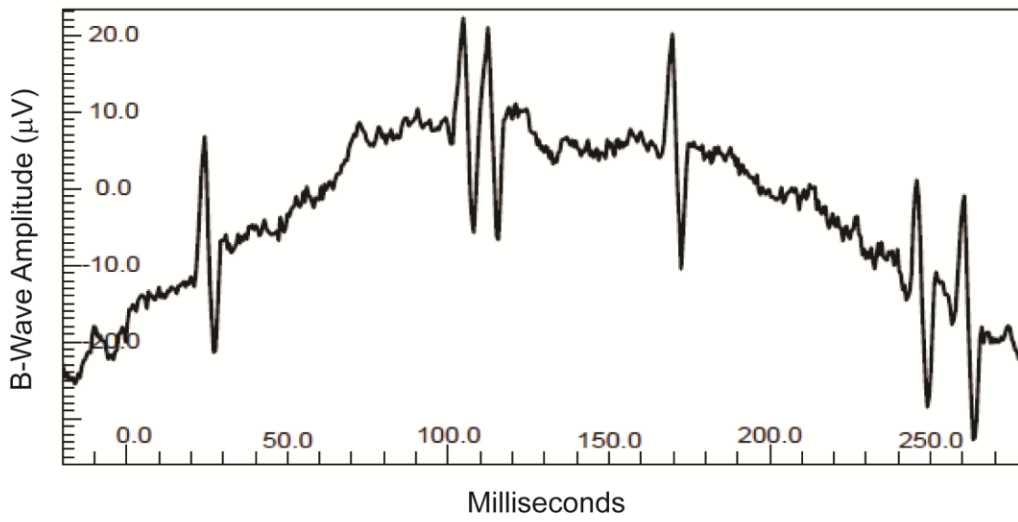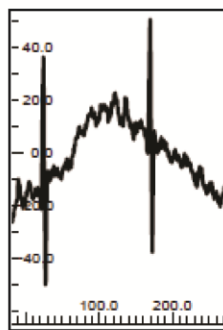

Sample 1

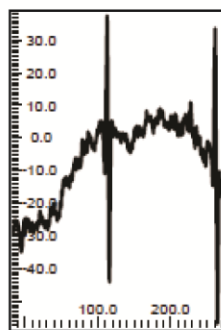

Sample 2

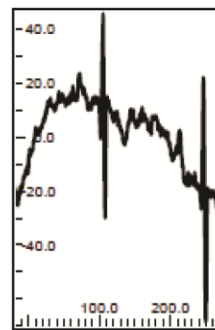

Sample 3

**Supplementary information, Figure S7** Transplanted eyes display ERG response at 7-10 weeks post-transplantation.

Animals that had positive ERG results at 4-5 weeks post-transplantation were measured again 7-10 weeks post-transplantation to determine if restored vision persisted. (A) A representative waveform from injected eye (blue) and control eye (black) at 7 weeks post-transplantation. (B) The waveform represents the average signal recorded after three independent flashes of light, separated by one minute (Samples 1-3).
