# Supplementary material
Source: PubMed Central journal article supplement (PMC3674387)
Supplement: cr201348x8.pdf [file cr201348x8.pdf]

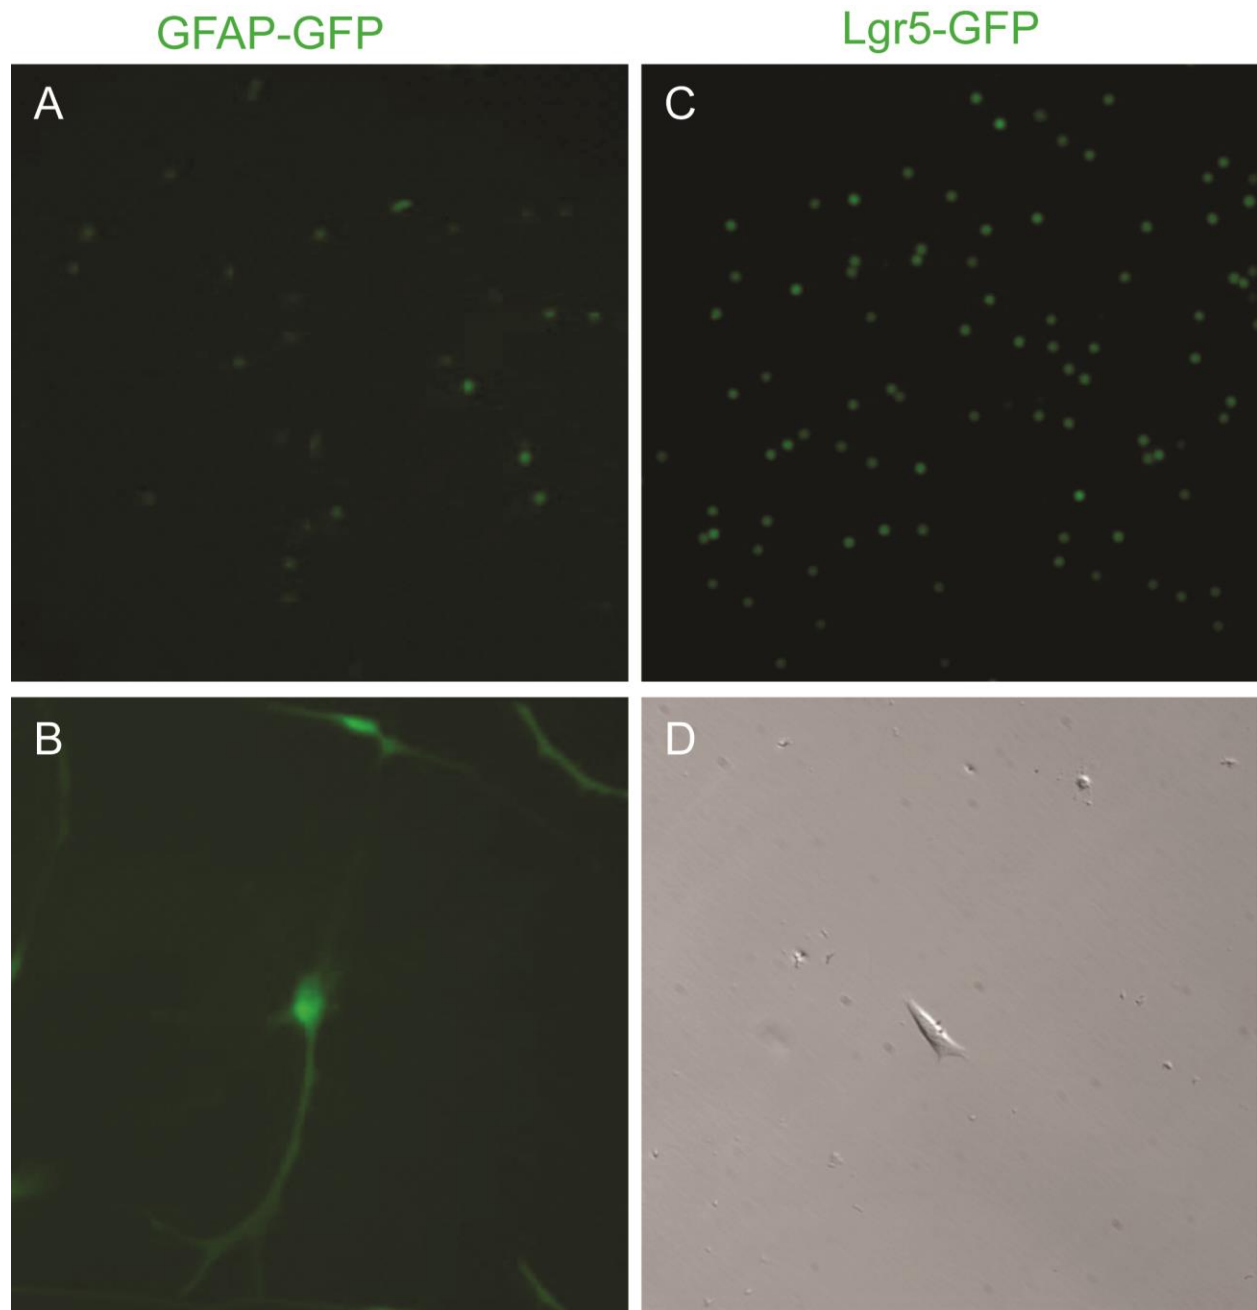

**Supplementary information, Figure S8** Sorted Müller cells and amacrine cells fail to establish retinal stem cell-like cell lines.

(A) GFAP-GFP positive cells immediately after fluorescence-activated cell sorting. (B) GFAP-GFP positive cells do not proliferate, and exhibit typical Müller cells morphology one week after sorting in culture. (C) Lgr5-GFP positive cells immediately after sorting. (D) Lgr5-GFP positive cells do not proliferate and have lost GFP expression two weeks after sorting.
