# Supplementary material
Source: PubMed Central journal article supplement (PMC3674387)
Supplement: cr201348x9.pdf [file cr201348x9.pdf]

**Supplementary information, Table S1 Established cell lines have varying differentiation potential**

| Cell line       | CD1-1 | CD1-4 | B6-2 | B6-5 |
|-----------------|-------|-------|------|------|
| Ganglion cell   | +     | +     | +    |      |
| Müller cell     | +     | +     | +    |      |
| Bipolar cell    | +     | +     | +    | +    |
| Amacrine cell   | +     | +     | +    | +    |
| Horizontal cell |       | +     | +    |      |
| Photoreceptor   |       | +     | +    | +    |
