# Supplementary material
Source: PubMed Central journal article supplement (PMC3674387)
Supplement: cr201348x10.pdf [file cr201348x10.pdf]

**Supplementary information, Table S2**

| <b>A). Percentage of retinal cells after 4 days in bFGF-containing differentiation medium</b> |                           |                  |            |            |
|-----------------------------------------------------------------------------------------------|---------------------------|------------------|------------|------------|
| Cell type                                                                                     | Antibody                  | Percent positive | Hoechst, n | Replicates |
| Ganglion cell                                                                                 | $\beta$ -tubulin III/NeuN | 33.97 $\pm$ 3.29 | 2966       | 5          |
| Müller cell                                                                                   | GS/Vimentin               | 30.05 $\pm$ 0.76 | 2198       | 4          |
| Photoreceptors                                                                                | Recoverin                 | 1.89 $\pm$ 0.19  | 1011       | 3          |
| Bipolar cell                                                                                  | PKC                       | 4.23 $\pm$ 0.93  | 880        | 3          |
| Amacrine cell                                                                                 | Pax6                      | 0                | 5000       | 3          |
| Horizontal cell                                                                               | Calbindin                 | 0                | 3400       | 3          |

| <b>B). Amacrine and Horizontal cells appear after 4 days in bFGF+NGF+IGF-1 differentiation medium</b> |           |                  |            |            |
|-------------------------------------------------------------------------------------------------------|-----------|------------------|------------|------------|
| Cell type                                                                                             | Antibody  | Percent positive | Hoechst, n | Replicates |
| Amacrine cell                                                                                         | Pax6      | 2.23 $\pm$ 0.32  | 2321       | 3          |
| Horizontal cell                                                                                       | Calbindin | 5.43 $\pm$ 0.61  | 4055       | 3          |
