# Supplementary material
Source: PubMed Central journal article supplement (PMC3674387)
Supplement: cr201348x11.pdf [file cr201348x11.pdf]

Supplementary information, Table S3

|               | Forward Primer (5' → 3')       | Reverse Primer (5' → 3')       |
|---------------|--------------------------------|--------------------------------|
| <b>Gapdh</b>  | ACGGCCGCATCTTCTTGTGCA          | CAAGTGGGCCCCCGGCCTTCTC         |
| <b>Nestin</b> | CCTCAACCCTCACCCTCTATTTT        | GCTTTTTACTGTCCCCGAGTTCTC       |
| <b>Sox2</b>   | TAGAGCTAGACTCCGGGCGATGA        | TTGCCTTAAACAAGACCACGAAA        |
| <b>Pax6</b>   | CACCACACCTGTCTCCTCCT           | ATAACTCCGCCCATTCCTG            |
| <b>Lhx2</b>   | CCTGCTTCAGCAAGGATGGC           | CTTCATGCCGAAATGGTCGC           |
| <b>Six3</b>   | GGGAGAAGGAGGCAGTTTTTC          | TTTACCATGCAAACGAACCA           |
| <b>Otx2</b>   | TCTTATCTAAAGCAACCGCCTTACGCAGTC | GCACCCTGGATTCTGGCAAGTTGATTTTCA |
| <b>Chx10</b>  | GCCACCTTCTTGGAAGTGCT           | TGTGTCGCCGCTTCTTACGC           |
| <b>Rax</b>    | CCCTGAGGCTAAACTTGCAG           | GTTCCCTTCTCCTCCTCCAC           |
